# Supplementary material for: IR and Raman spectra of β″-(BEDT-TTF)2RCH2SO3 (R = SF5, CF3): dimerization related to hydrogen bonding
Source: Royal Society of Chemistry journal article supplement (doi:10.1039/b822253c), 2009-01-01
Supplement: b822253c.pdf [file b822253c.pdf]

## Supplementary Data

### Infrared and Raman spectra of $\beta''$ -(BEDT-TTF)<sub>2</sub>RCH<sub>2</sub>SO<sub>3</sub> (R = SF<sub>5</sub>, CF<sub>3</sub>): dimerization related to hydrogen bonding

Iwona Olejniczak, Bolesław Barszcz, Anna Szutarska, and Andrzej Graja  
*Institute of Molecular Physics, Polish Academy of Sciences,  
Smoluchowskiego 17, 60-179 Poznań, Poland*

Roman Wojciechowski  
*Department of Molecular Physics, Faculty of Chemistry,  
Technical University of Łódź, Żeromskiego 116, 90-924 Łódź, Poland*

John A. Schlueter, Aaron N. Hata, and Brian H. Ward  
*Materials Science Division, Argonne National Laboratory,  
Argonne, Illinois 60439-4831, USA*

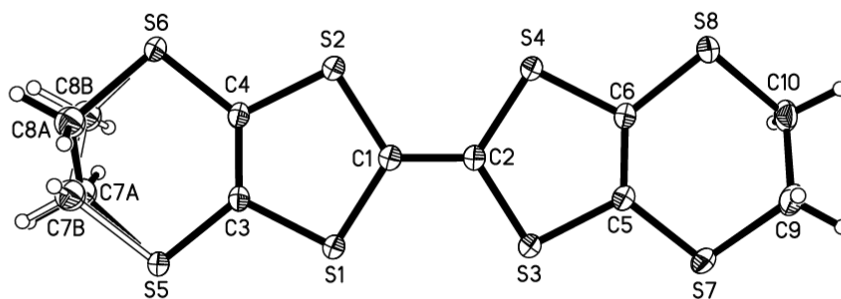

Figure S1. Atomic numbering scheme for BEDT-TTF radical cation A in the  $\beta''$ -(BEDT-TTF)<sub>2</sub>CF<sub>3</sub>CH<sub>2</sub>SO<sub>3</sub> structure at 150 K. Thermal ellipsoids are drawn at the 50% probability level.

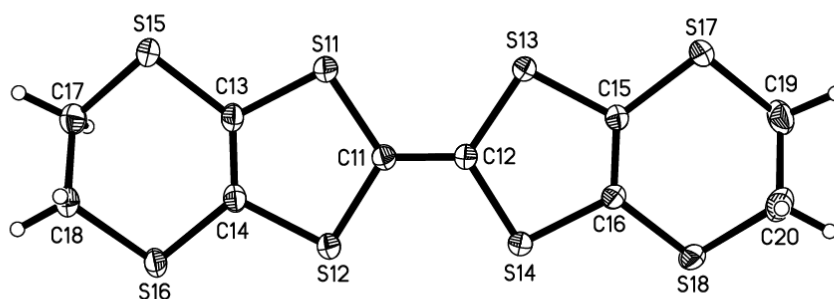

Figure S2. Atomic numbering scheme for BEDT-TTF radical cation B in the  $\beta''$ -(BEDT-TTF)<sub>2</sub>CF<sub>3</sub>CH<sub>2</sub>SO<sub>3</sub> structure at 150 K. Thermal ellipsoids are drawn at the 50% probability level.

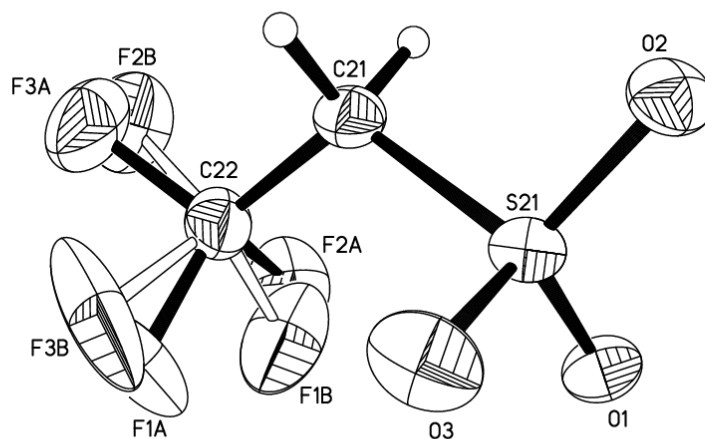

Figure S3. Atomic numbering scheme for the CF<sub>3</sub>CH<sub>2</sub>SO<sub>3</sub><sup>-</sup> anion with in the  $\beta''$ -(BEDT-TTF)<sub>2</sub>CF<sub>3</sub>CH<sub>2</sub>SO<sub>3</sub> structure at 150 K. Thermal ellipsoids are drawn at the 50% probability level.

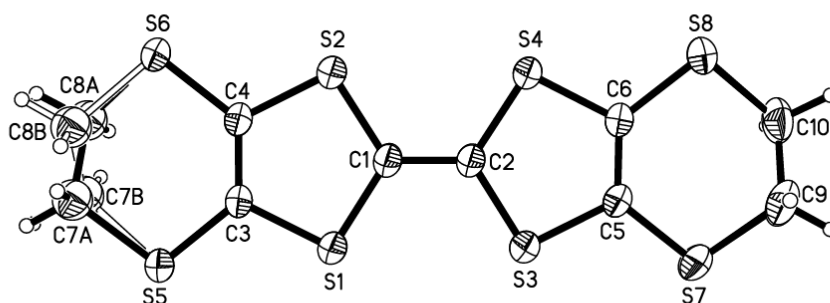

Figure S4. Atomic numbering scheme for BEDT-TTF radical cation A in the  $\beta''$ -(BEDT-TTF)<sub>2</sub>CF<sub>3</sub>CH<sub>2</sub>SO<sub>3</sub> structure at 298 K. Thermal ellipsoids are drawn at the 50% probability level.

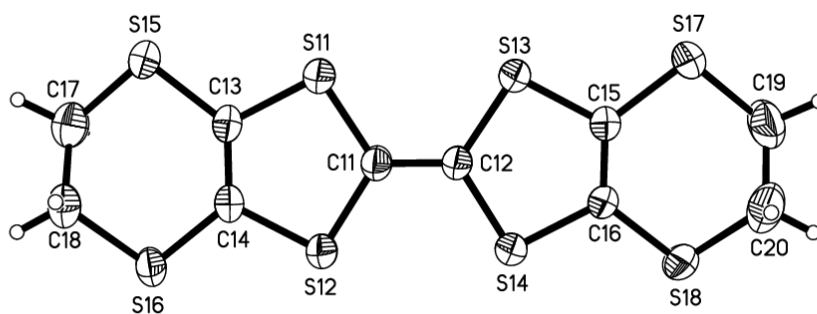

Figure S5. Atomic numbering scheme for the BEDT-TTF radical cation B in the  $\beta''$ -(BEDT-TTF)<sub>2</sub>CF<sub>3</sub>CH<sub>2</sub>SO<sub>3</sub> structure at 298 K. Thermal ellipsoids are drawn at the 50% probability level.

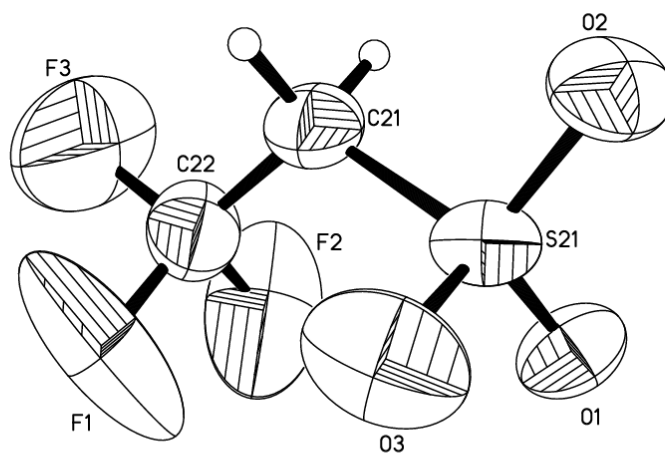

Figure S6. Atomic numbering scheme for the  $\text{CF}_3\text{CH}_2\text{SO}_3^-$  anion with in the  $\beta''$ -(BEDT-TTF) $_2\text{CF}_3\text{CH}_2\text{SO}_3$  structure at 298 K. Thermal ellipsoids are drawn at the 50% probability level.
